# Supplementary material for: Activation of the Nkx2.5–Calr–p53 signaling pathway by hyperglycemia induces cardiac remodeling and dysfunction in adult zebrafish
Source: PubMed Central journal article supplement (PMC5665450; doi:10.1242/dmm.026781), 2017-10-01
Supplement: dmm-10-026781-s1.pdf [file dmm-10-026781-s1.pdf]

## Supplementary Table 1

**Table S1. Gene-specific primers for real-time PCR**

| <b>Gene</b>     | <b>Primer sequence (5'-3')</b> |
|-----------------|--------------------------------|
| <b>Nkx2.5-F</b> | GGGATGGTAAACCGTGTCTGG          |
| <b>Nkx2.5-R</b> | TAGTTGCTGTTGGACTGTGAAGG        |
| <b>Calr-F</b>   | AAACAGATTGACAACCCCTCCT<br>AC   |
| <b>Calr-R</b>   | CAGCCTCCTCAACATCATCGG          |
| <b>p53-F</b>    | ATAAGAGTGGAGGGCAATCAGC<br>GA   |
| <b>p53-R</b>    | AGTGATGATTGTGAGGATGGGC<br>CT   |
| <b>GLUT1-F</b>  | CCTGTTGCCCTTCTGTCCTG           |
| <b>GLUT1-R</b>  | CCTCATCATCTGTCTGCTCTCG         |
| <b>nppa-F</b>   | GATGTACAAGCGCACACGTT           |
| <b>nppa-R</b>   | TCTGATGCCTCTTCTGTTGC           |
| <b>nppb-F</b>   | CATGGGTGTTTTAAAGTTTCTCC        |
| <b>nppb-R</b>   | CTTCAATATTTGCCGCCTTTAC         |
| <b>18S-F</b>    | CACTTGTCCTCTAAGAAGTTGC<br>A    |
| <b>18S-R</b>    | GGTTGATTCCGATAACGAACGA         |

F, forward; R, reverse.

## Supplementary Figures

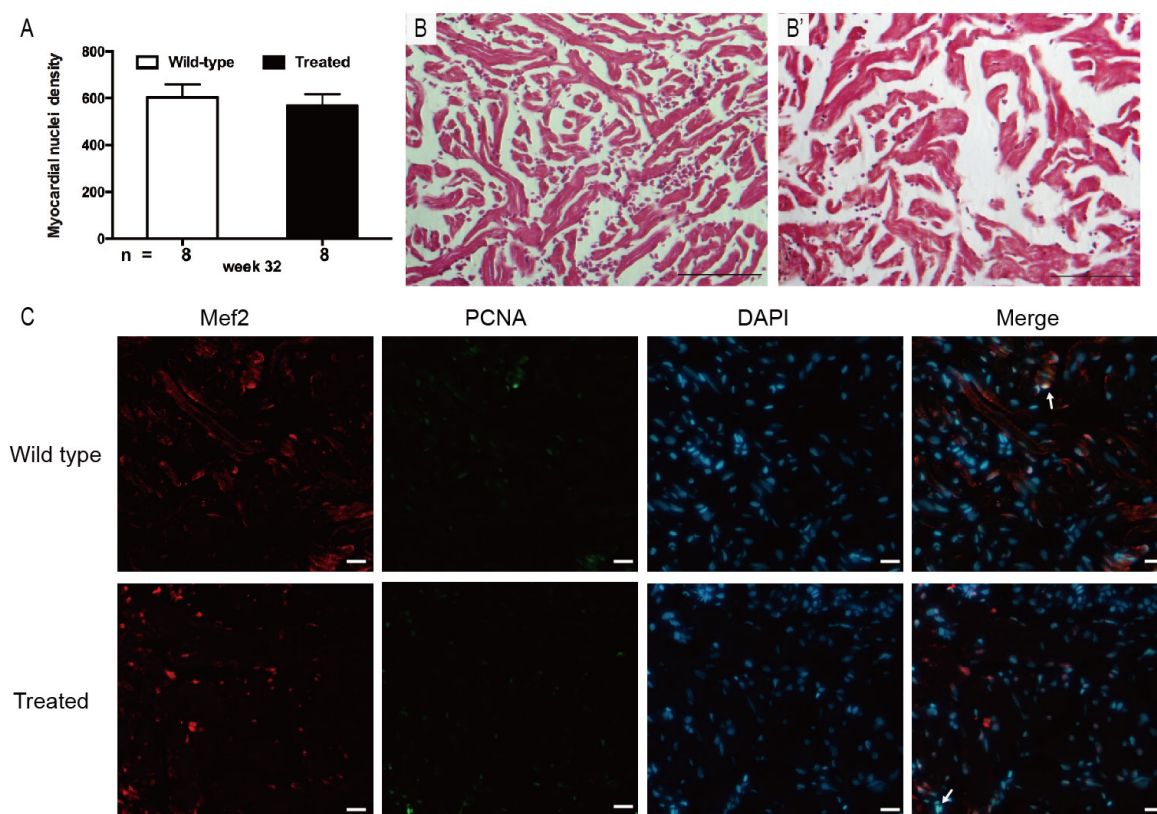

**Supplementary Figure 1.** (A) Myocardial nuclei density, defined as number of myocardial nuclei per field to myocardial density, showing no difference in two groups at week 32 ( $p > 0.05$ ). (B) Masson's staining did not show any interstitial fibrosis in the two groups ( $n = 15$  field, repeated five times); scale bar =  $100\mu\text{m}$ . (C) Co-staining of PCNA (green), Mef2 (red) with DAPI (blue) on cryosections of adult zebrafish hearts, indicating no significant difference in PCNA staining between wild-type and treated group ( $n = 15$  field, repeated five times); scale bar =  $10\mu\text{m}$ ; Arrows: PCNA+/Mef2+/DAPI+. (A) Bars represent mean  $\pm$  standard error of the mean,  $n =$  number of fish examined.

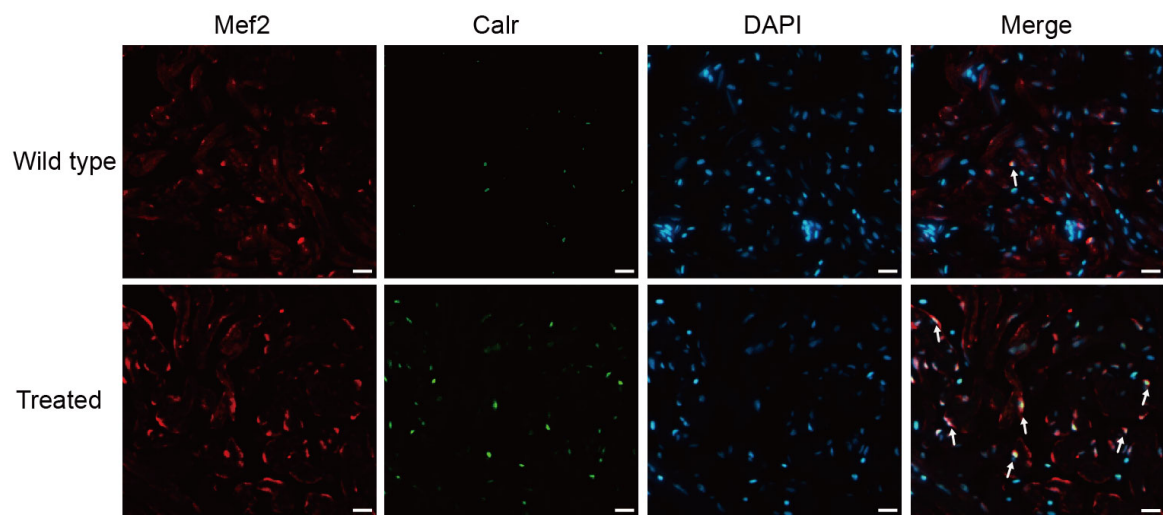

**Supplementary Figure 2.** Co-staining of Calr (green), Mef2 (red) with DAPI (blue) on cryosections of adult zebrafish hearts, indicating increased Calr expression on cardiomyocytes of treated fish compared with the wild-type ( $n = 15$  field, repeated five times); scale bar =  $10\mu\text{m}$ ; Arrows: Calr+/Mef2+/DAPI+ (white, green and red plus blue).

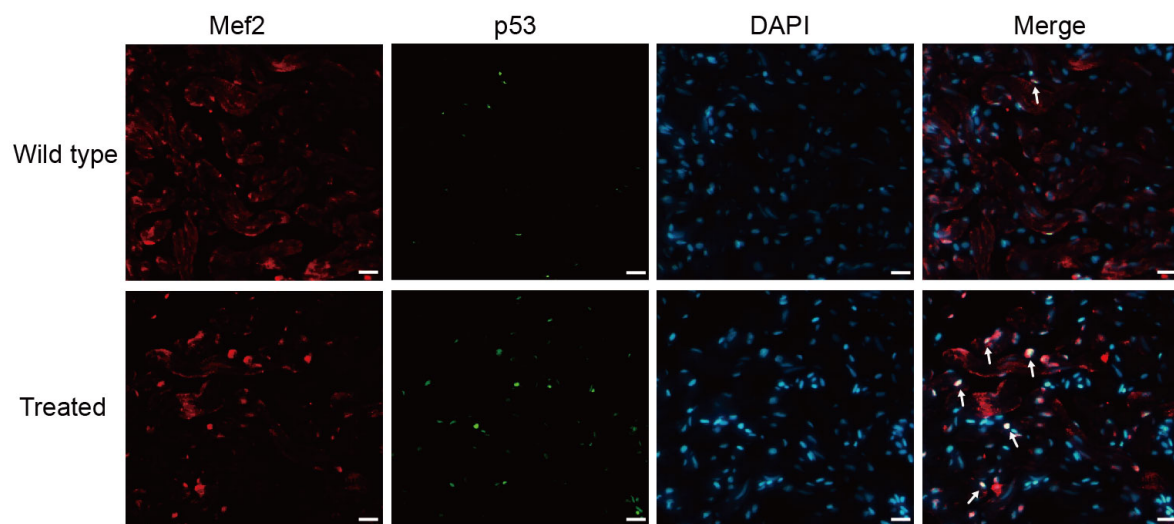

**Supplementary Figure 3.** Co-staining of p53 (green), Mef2 (red) with DAPI (blue) on cryosections of adult zebrafish hearts, indicating increased p53 expression on cardiomyocytes of treated fish compared with the wild-type ( $n = 15$  field, repeated five times); scale bar =  $10\mu\text{m}$ ; Arrows: p53+/Mef2+/DAPI+ (white, green and red plus blue).

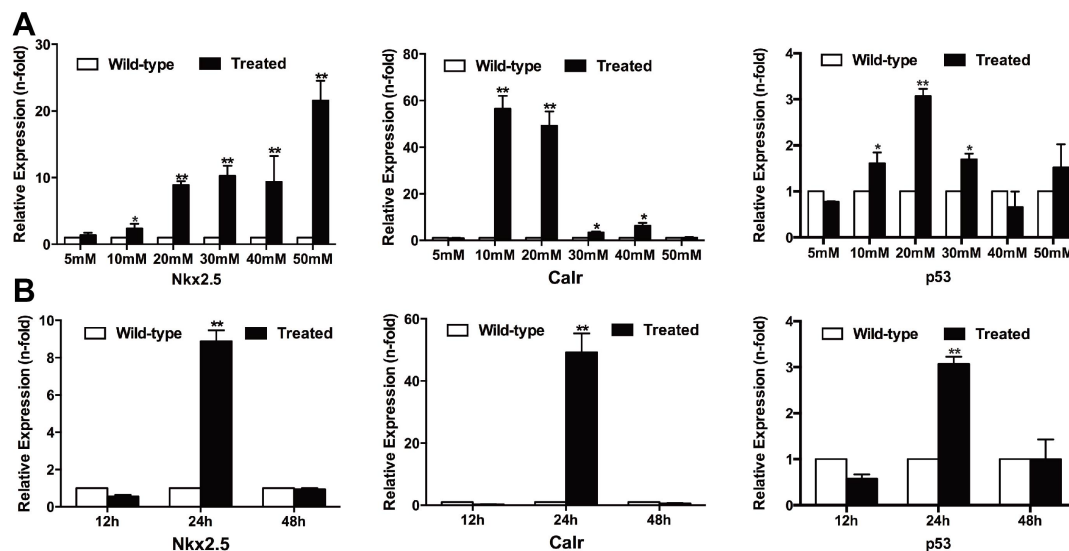

**Supplementary Figure 4. Determination of the optimal conditions for glucose treatment**

**of cardiomyocytes.** (A) Real-time PCR analysis of *Nkx2.5*, calreticulin, and *p53* in cardiomyocytes (CMs) exposed to glucose for 24 h at different concentrations (5, 10, 20, 30, 40, 50 mM), compared with the wild-type group. (B) Real-time PCR analysis of *Nkx2.5*, *calreticulin*, and *p53* in CMs exposed to 20 mM glucose for different times (12, 24, 48 h).

(A-B) Bars represent mean  $\pm$  standard error of the mean (n = 5-6 fish per group). \*p < 0.05,

\*\*p < 0.01 as compared with the wild-type group.

## Supplementary Videos

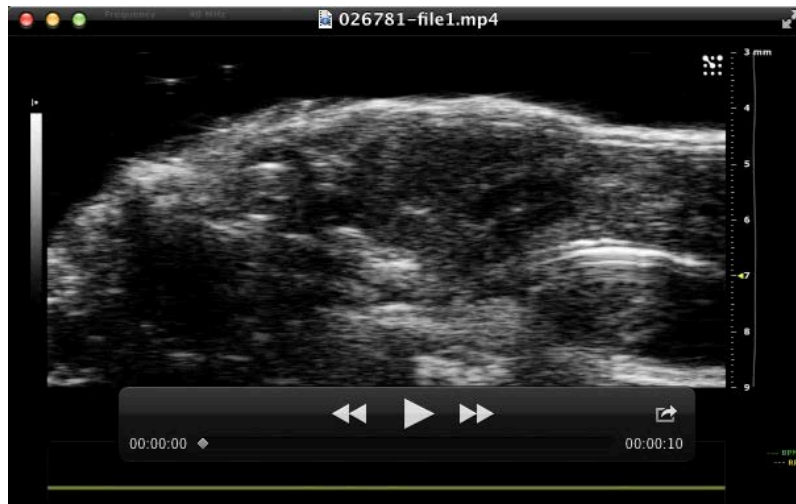

**Movie 1.** Ventricular morphology of the wild-type zebrafish at week 32, derived from B-mode echocardiography.

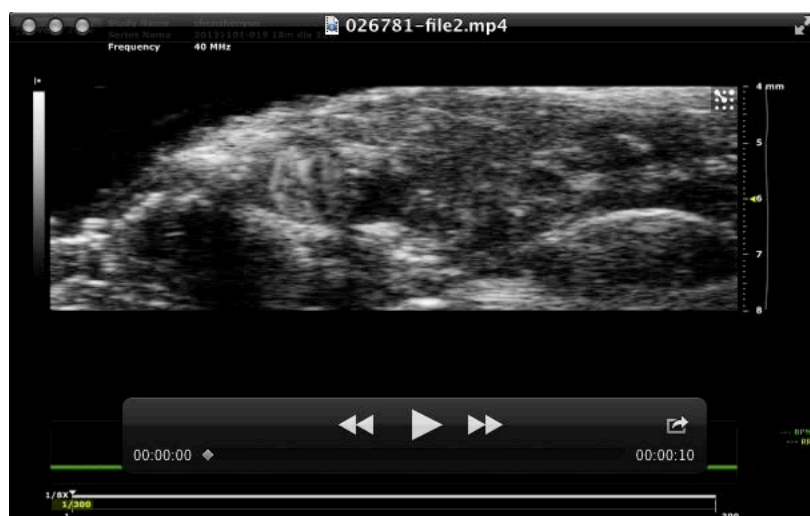

**Movie 2.** Ventricular morphology of the treated zebrafish at week 32, derived from B-mode echocardiography.

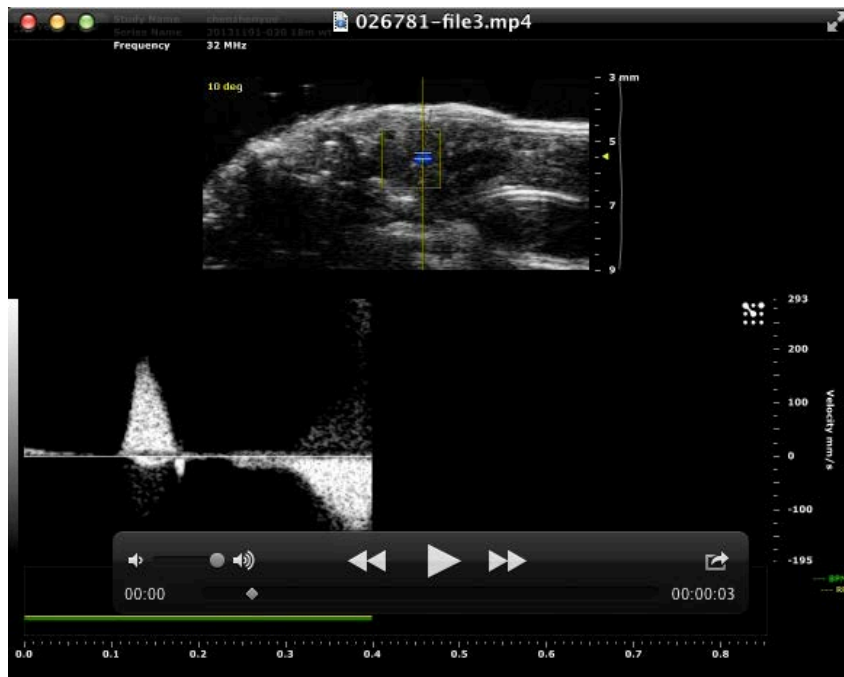

**Movie 3.** Atrioventricular (AV) valve velocity of the wild-type zebrafish at week 32, derived from Doppler echocardiography.

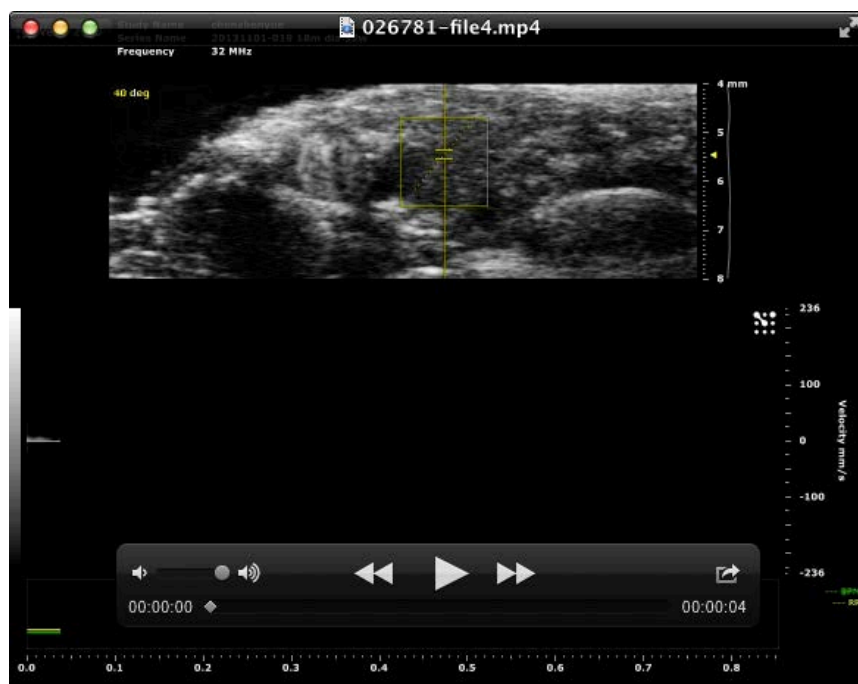

**Movie 4.** Atrioventricular (AV) valve velocity of the treated zebrafish at week 32, derived from Doppler echocardiography.
